# Supplementary material for: We can be heroes: MLA’s leadership journey(s)
Source: PubMed Central journal article supplement (PMC5234446; doi:10.5195/jmla.2017.127), 2017-01
Supplement: jmla_jan17_tooey_appb.pdf [file jmla_jan17_tooey_appb.pdf]

# We Can Be Heroes: MLA's Leadership Journey(s)

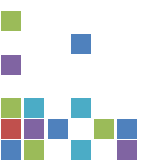

# Barbara and Me – the 80s

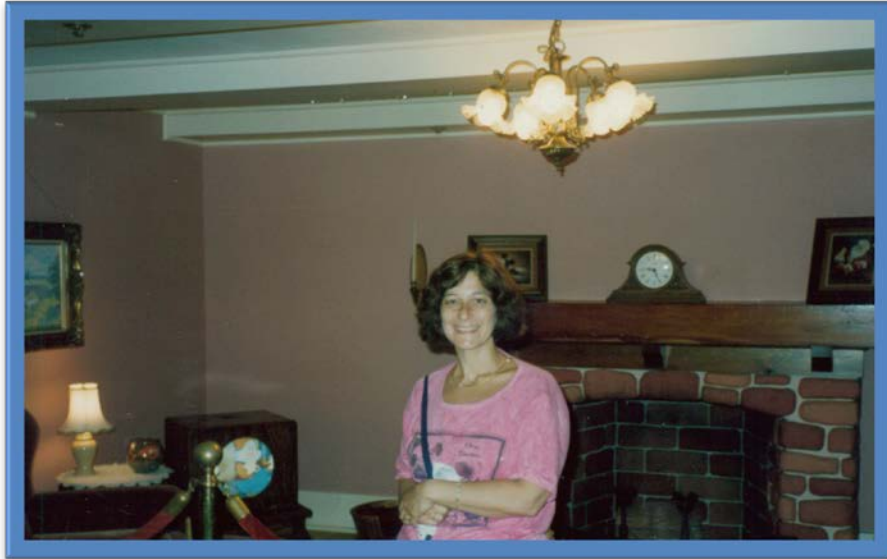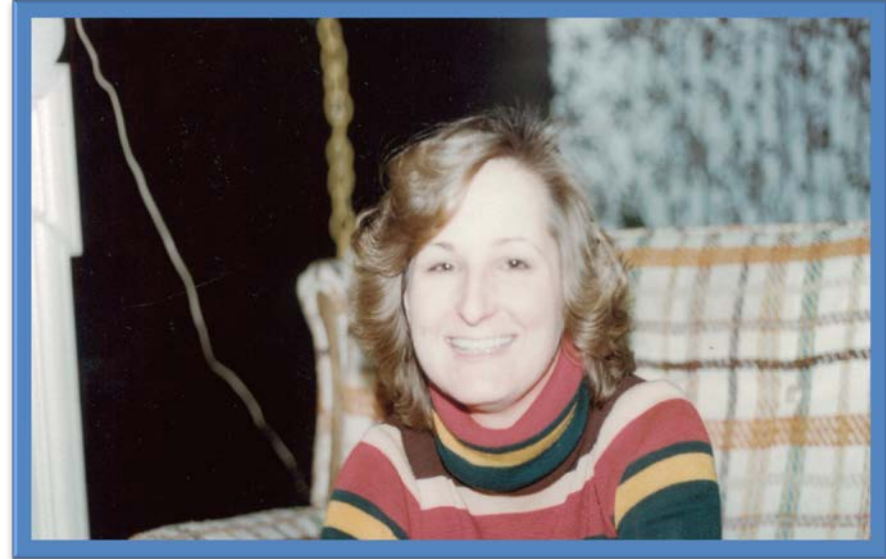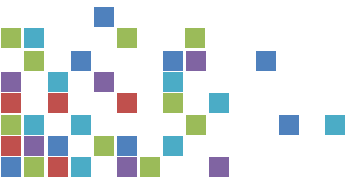

# Thanks

- 
- Kris Alpi
  - Rachael Anderson
  - Gretchen Arnold
  - Kevin Baliozian
  - Charles Bandy
  - Margaret Bandy
  - Tom Basler
  - Amy Blevins
  - Aphrodite Bodycomb
  - David Bowie
  - Estelle Brodman
  - Naomi Broering
  - Judy Burnham
  - Karen Butter
  - Margaret Charlton
  - Kate Corcoran
  - Janet Doe
  - Jacque Doyle
  - Barbara Epstein
  - Julia Esparza
  - Sandra Franklin
  - Meg Fielding
  - Rick Forsman
  - Gary Freiburger
  - June Fulton
  - Stephanie Fulton
  - Carla Funk
  - Mark Funk
  - Brad Gerhart
  - Frances Groen
  - Gale Hannigan
  - Heidi Heilemann
  - Patricia Hinegardner
  - Heather Holmes
  - Ruth Holst
  - J. Michael Homan
  - Bruce Jarrell, MD
  - Carol Jenkins
  - Diane Johnson
  - Dixie Jones
  - Bohyun Kim
  - Robin Klein
  - Teresa Knott
  - Michelle Kraft
  - Jan LaBeause
  - Mary Langman
  - Maria Lopez
  - Nancy Lorenzi
  - Richard Lucier
  - Elizabeth Lund
  - Alexa Mayo
  - Nina Matheson
  - Phyllis Mirsky
  - Ray Naegele
  - Marcia C. Noyes
  - Jay Perman, MD
  - Jerry Perry
  - Jodi Philbrick
  - Thom Pinho
  - T. Scott Plutchak
  - J. Dale Prince
  - Bart Ragon
  - Carolyn Reid
  - Fred Roper
  - Mary Ryan
  - Charles Sargent
  - Connie Schardt
  - Chris Shaffer
  - Jean Shipman
  - Julia Sollenberger
  - Nancy Tannery
  - Pat Thibodeau
  - Lisa Traditi
  - UM HS/HSL Library Team
  - Linda Walton
  - Linda Watson
  - 
  - *Special Thanks and Love*
  - Ron Huffman
  - Greer Huffman Griffith

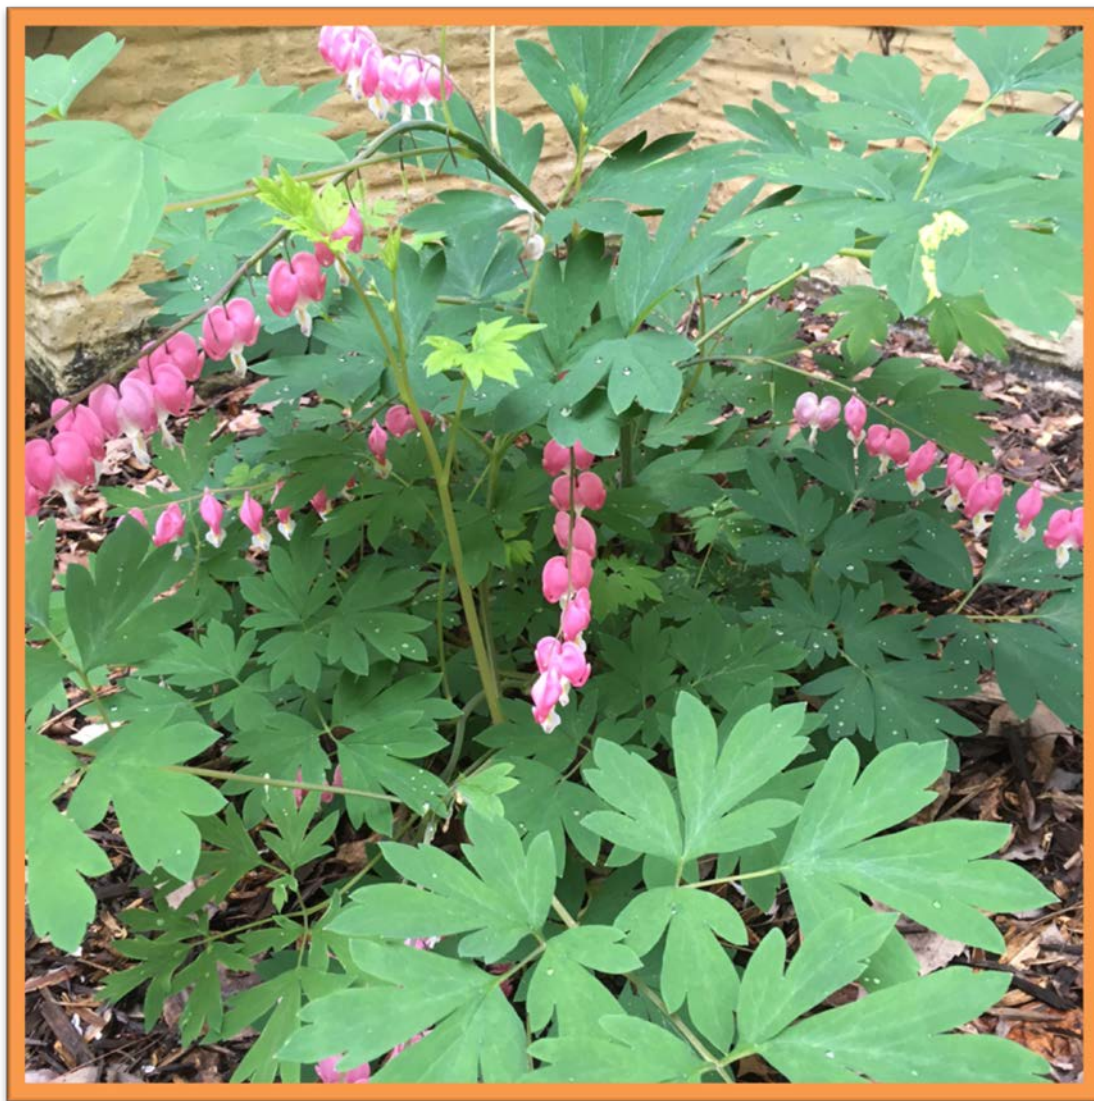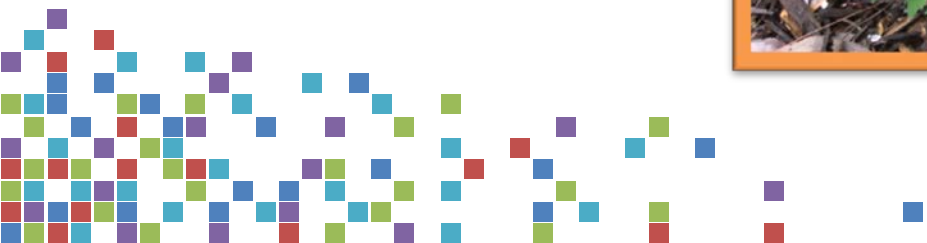

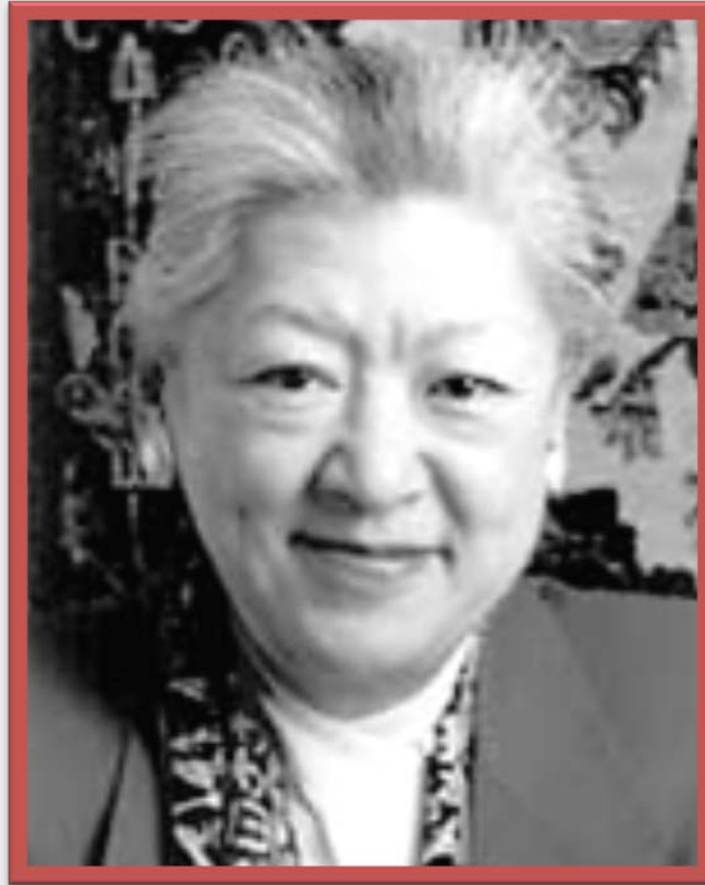

Nina Matheson – 1994 Janet Doe Lecturer

“The Idea of the Library in the 21<sup>st</sup> Century”

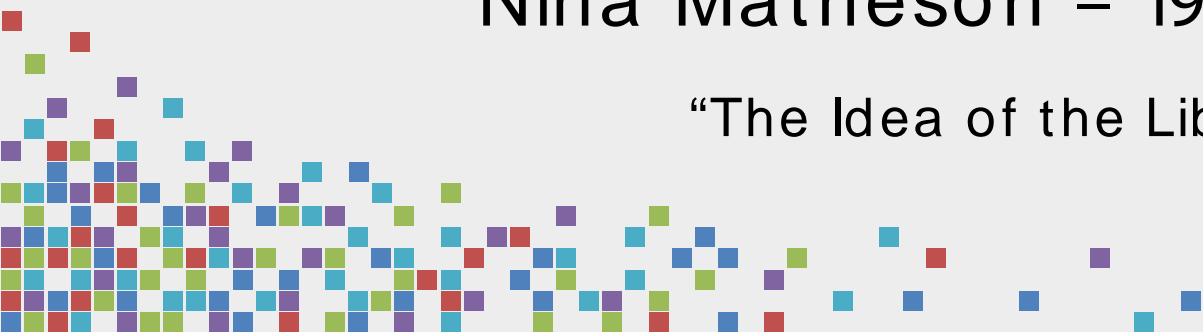

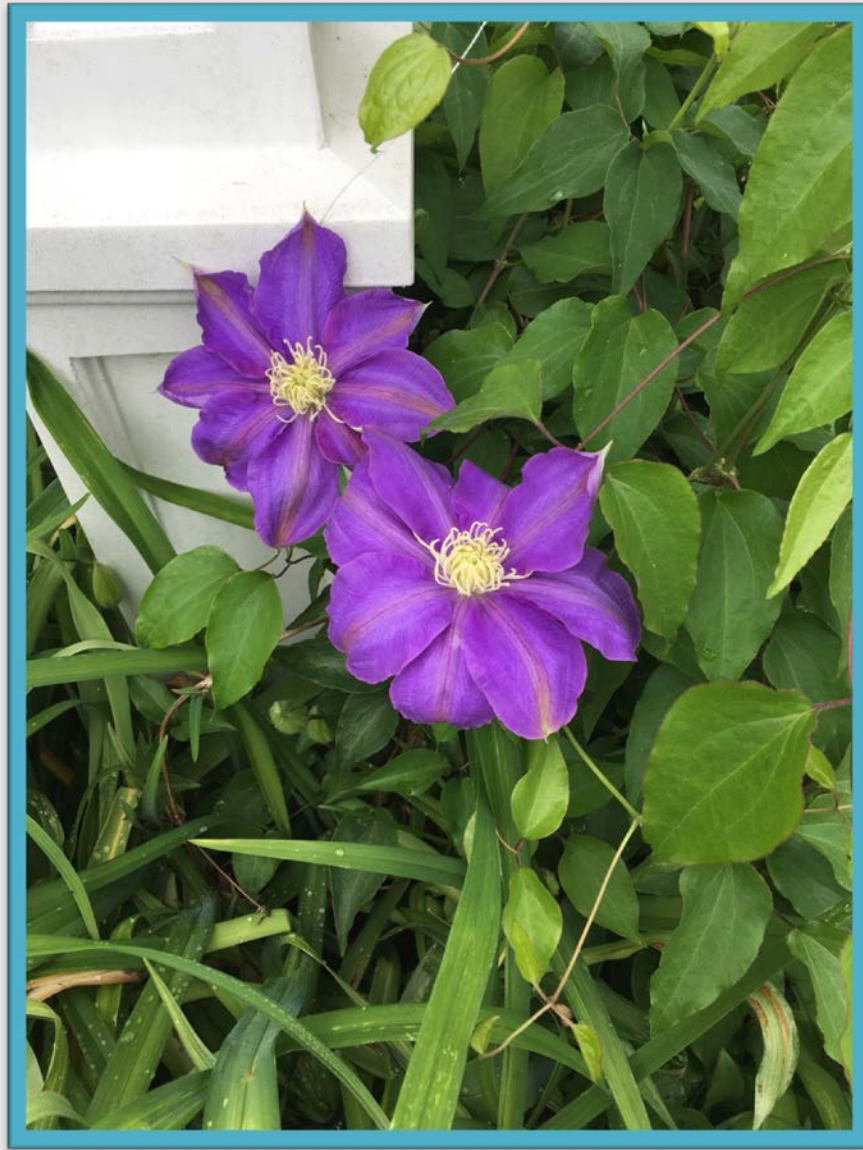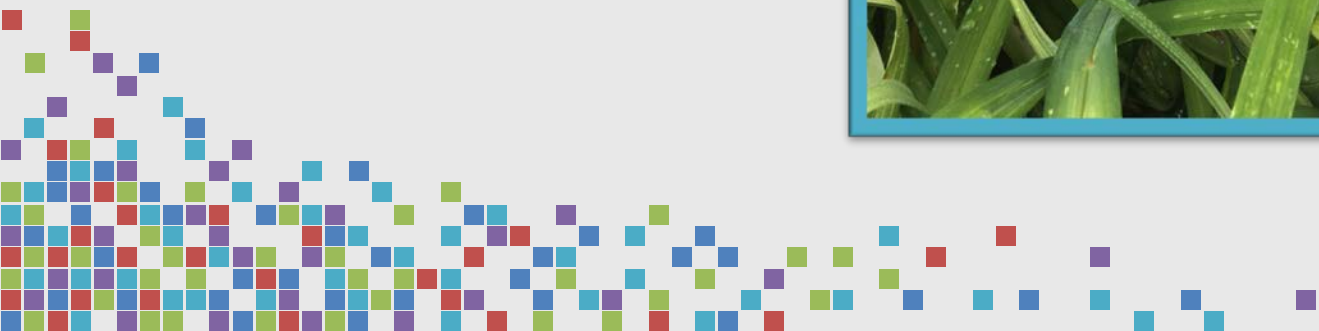

# Truths and Confessions

1. No luminaries
2. No Does
3. No frills

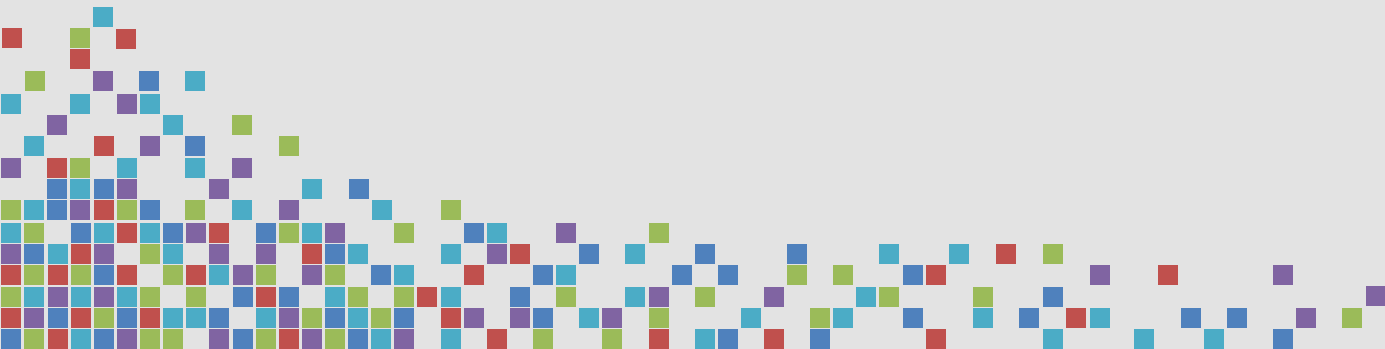

50

30

10

# David Bowie dies

*(January 10, 2016)*

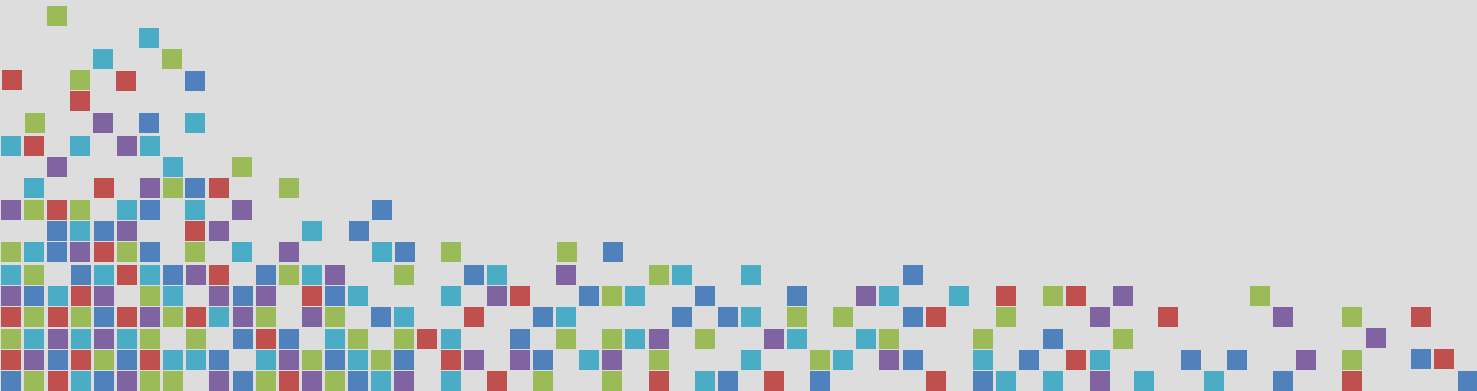



# We Can Be Heroes: MLA's Leadership Journey(s)

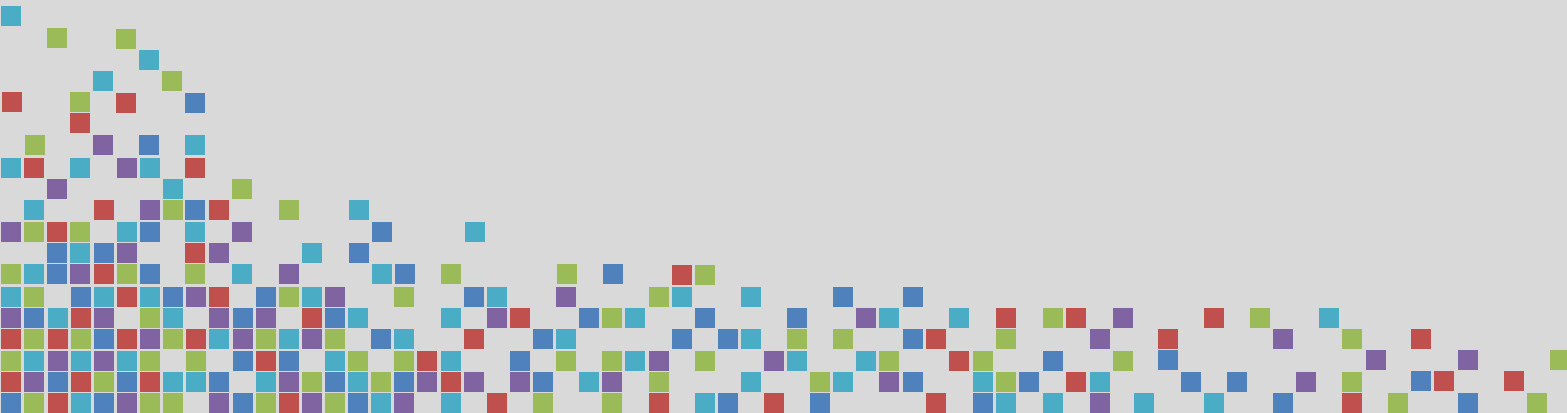

# Kotter – “W h a t L e a d e r s R e a l l y D o ”

## Managers

- Planning/budgeting
- Organizing/staffing
- Controlling

## Leaders

- Vision/strategies
- Aligning
- Motivating

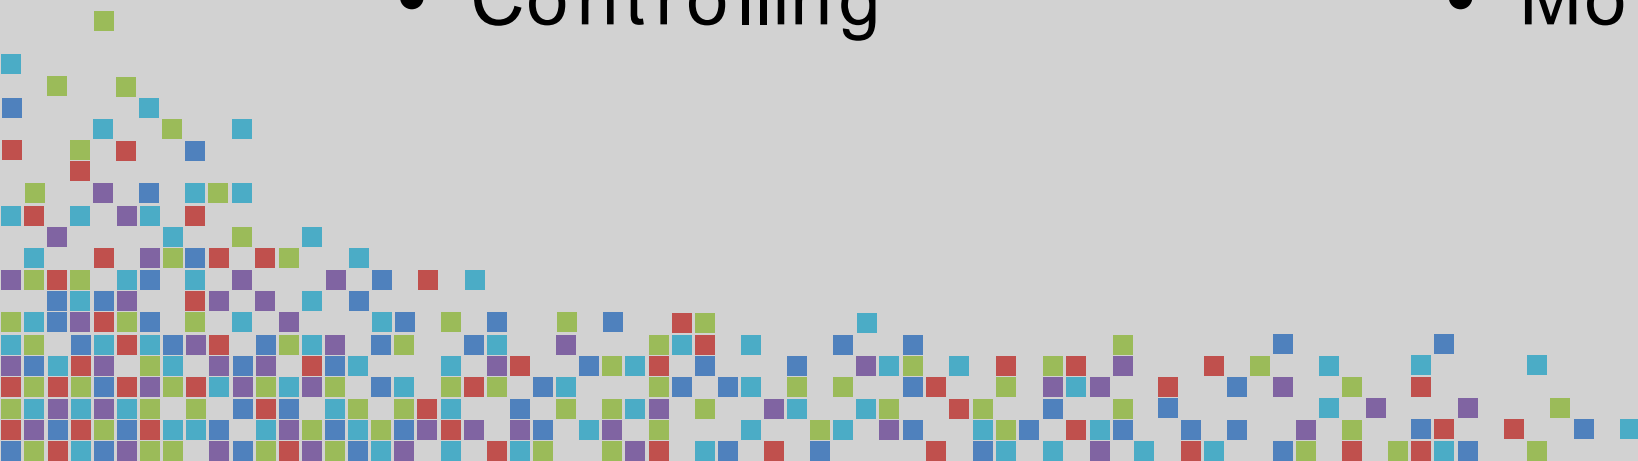

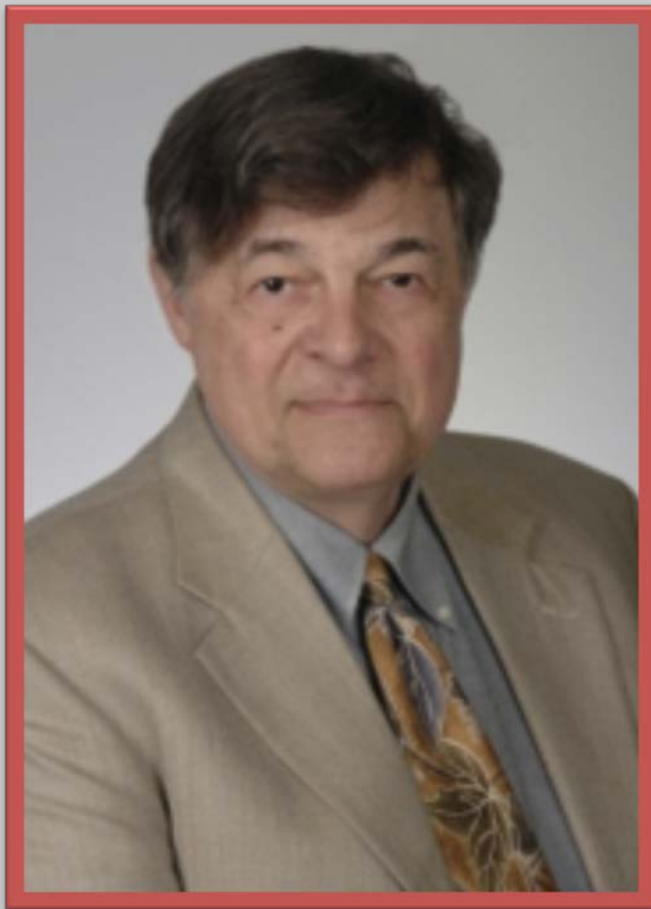

Tom Basler – 2008 Janet Doe Lecturer

“There Are No More Giants:  
Changing Leadership for Changing Times”

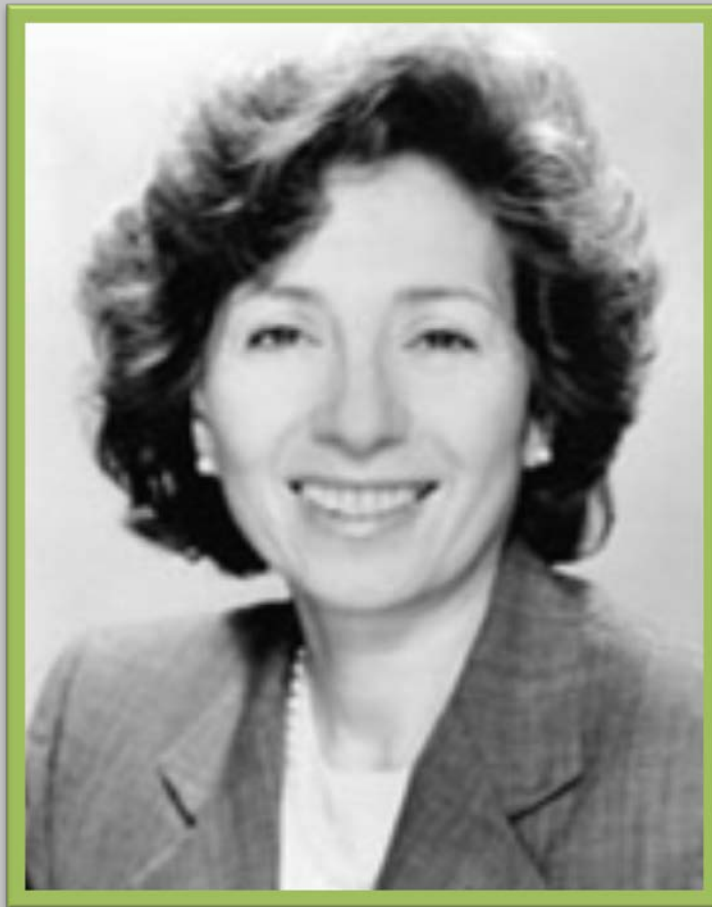

Rachael K. Anderson - 1989 Janet Doe Lecture

“Reinventing the Medical Librarian”

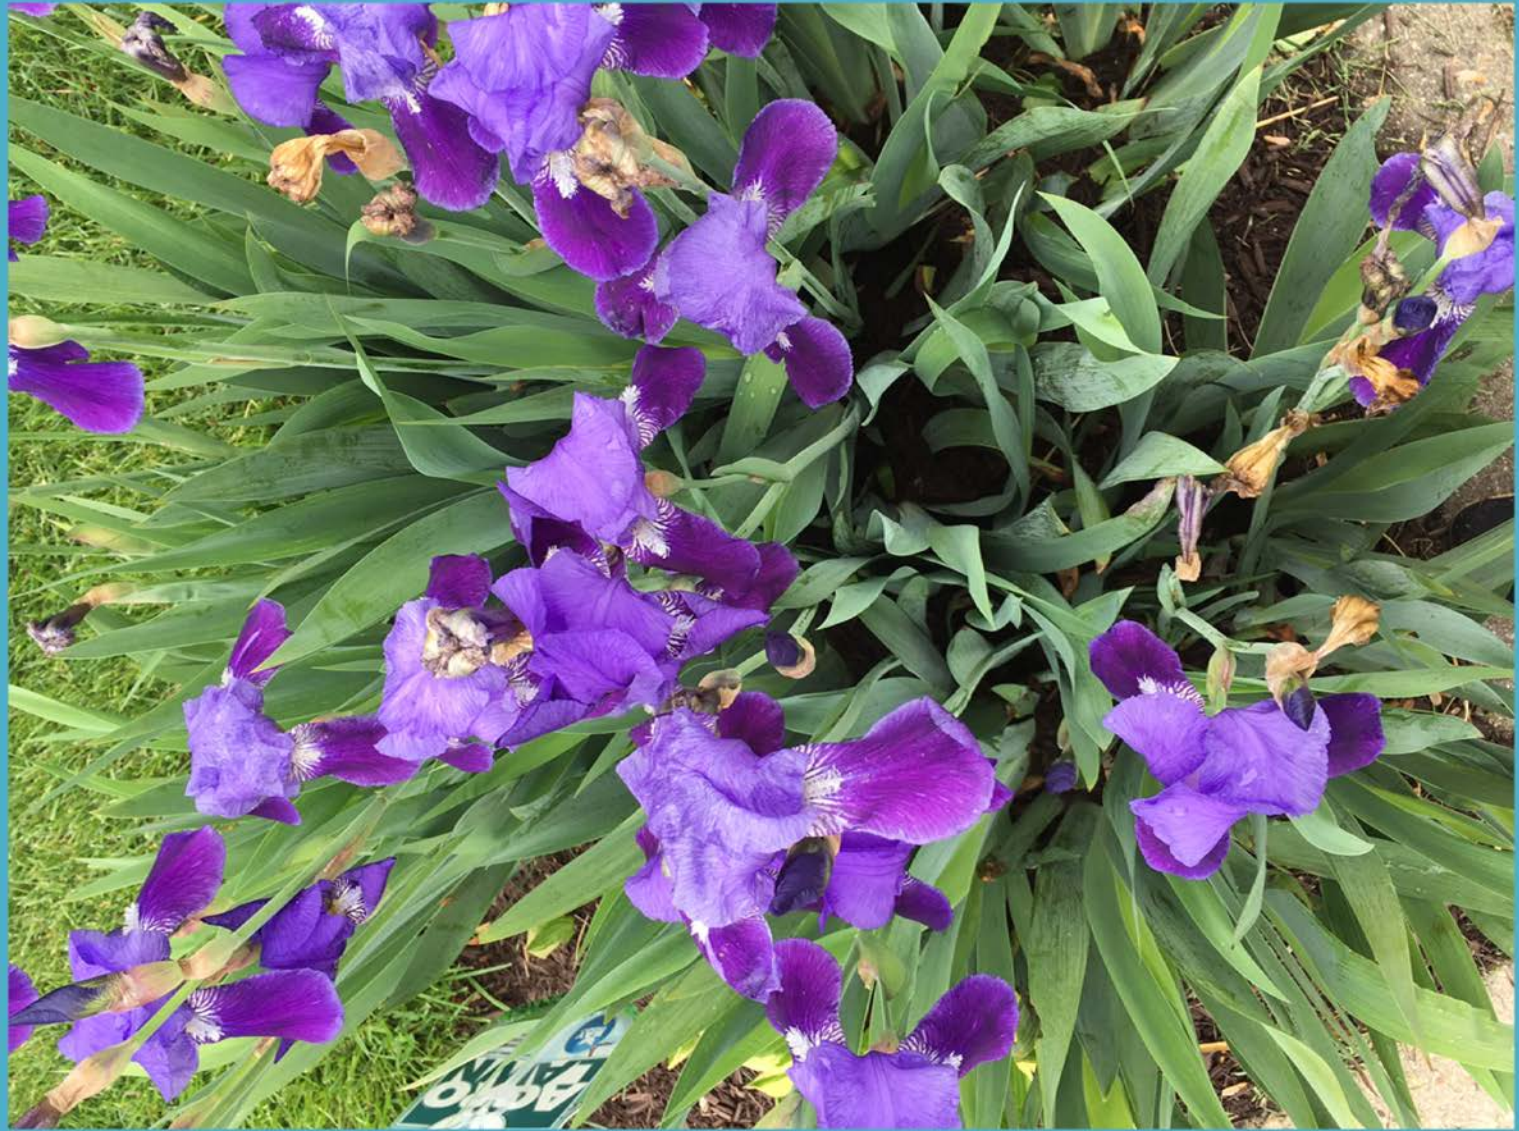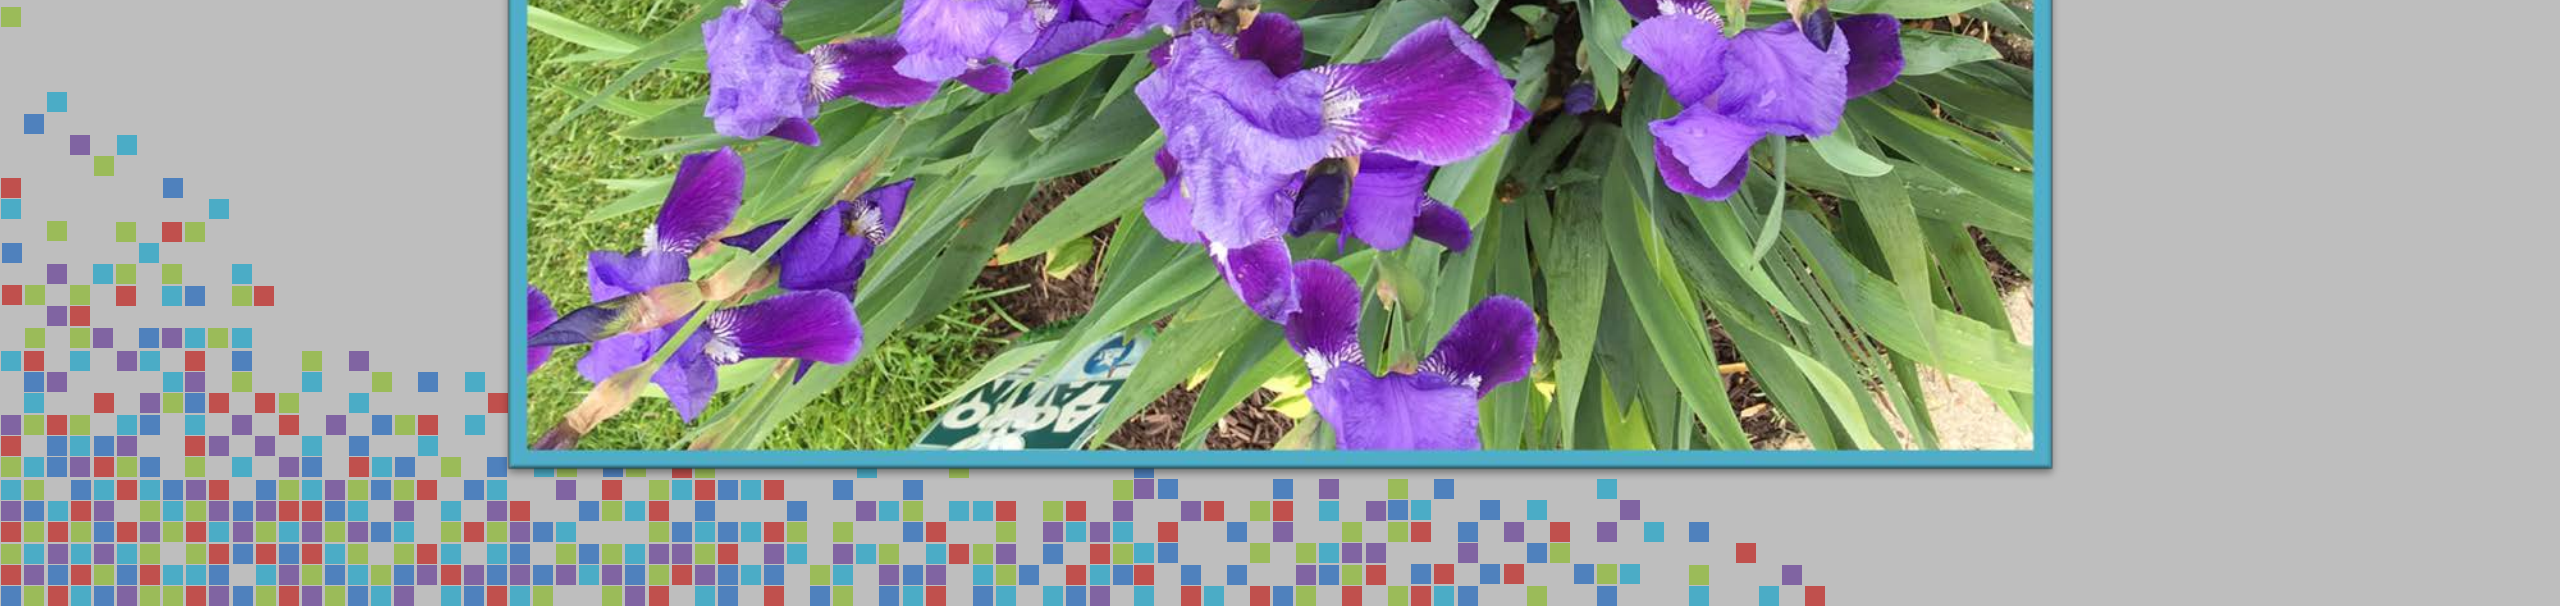

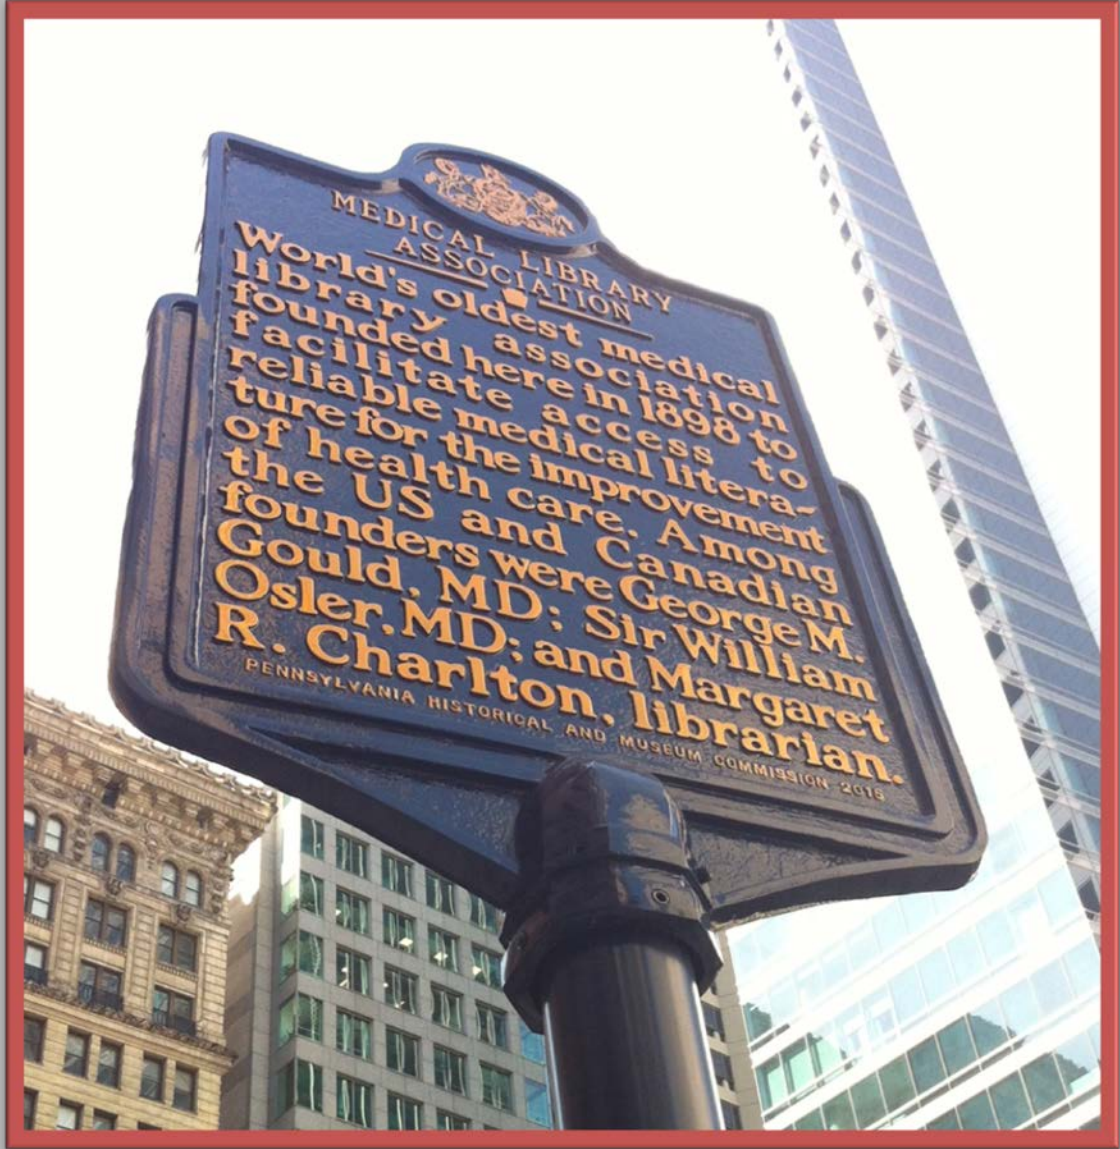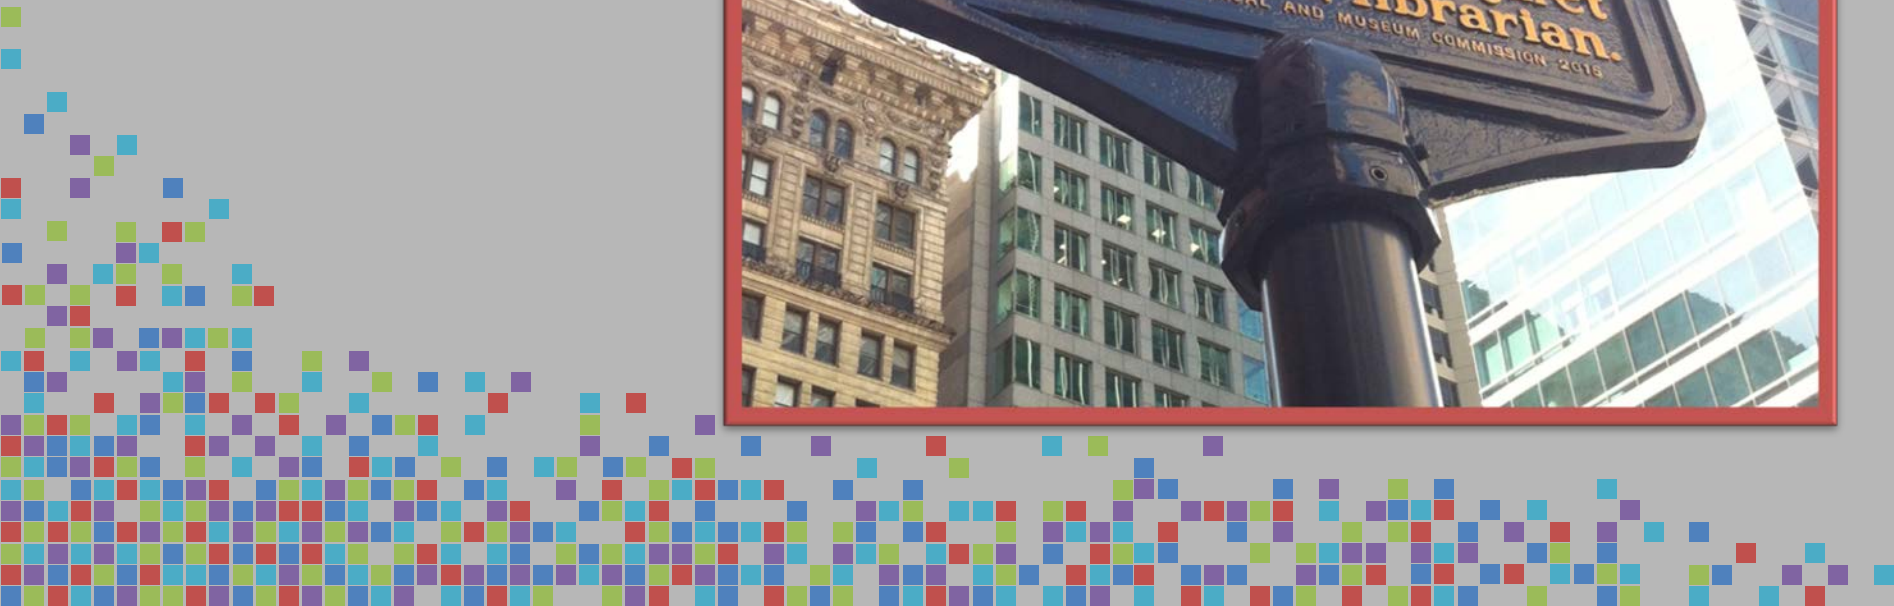

# Marcia C. Noyes

1896 – Around the time she was  
hired at the Medical and  
Chirurgical Faculty of Maryland

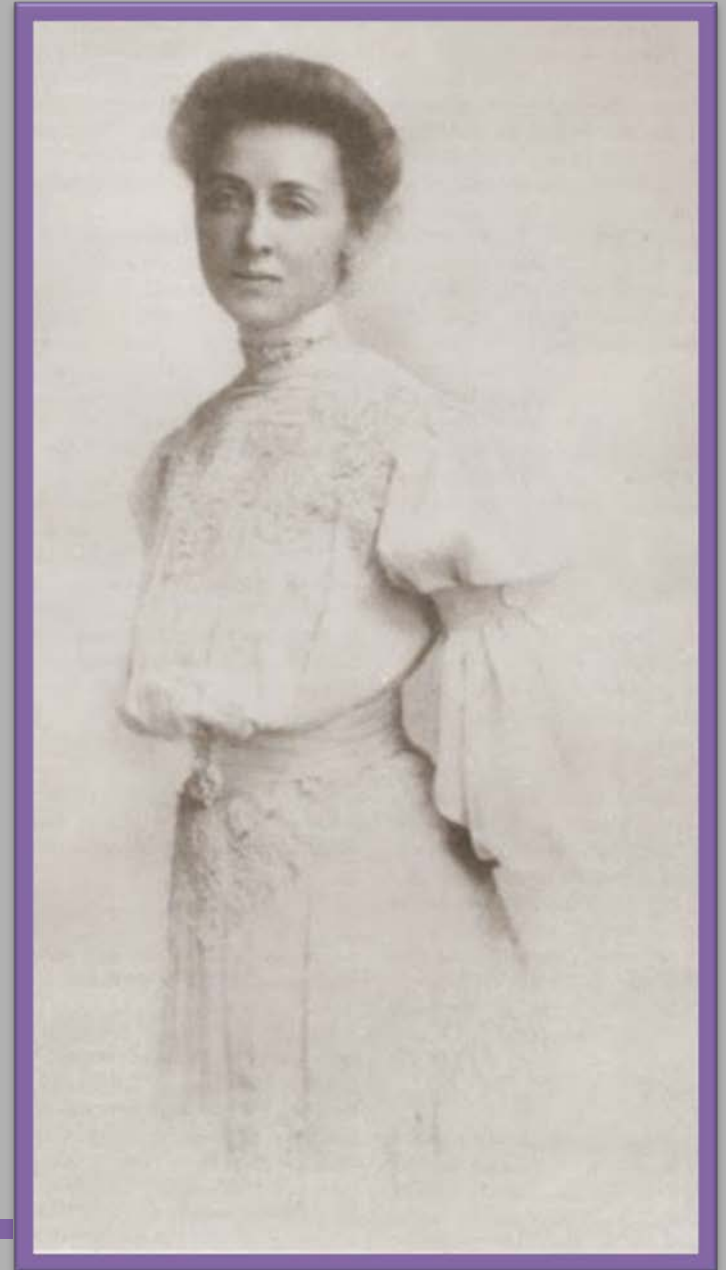

# Marcia Noyes at the mid-point of her career and in her apartment at Med-Chi

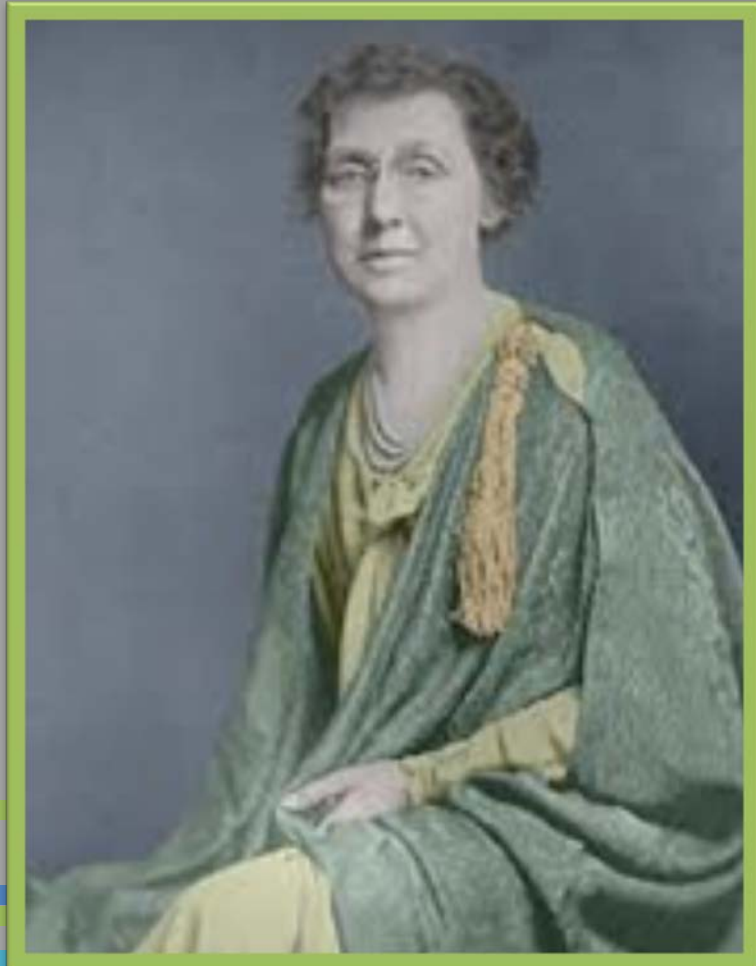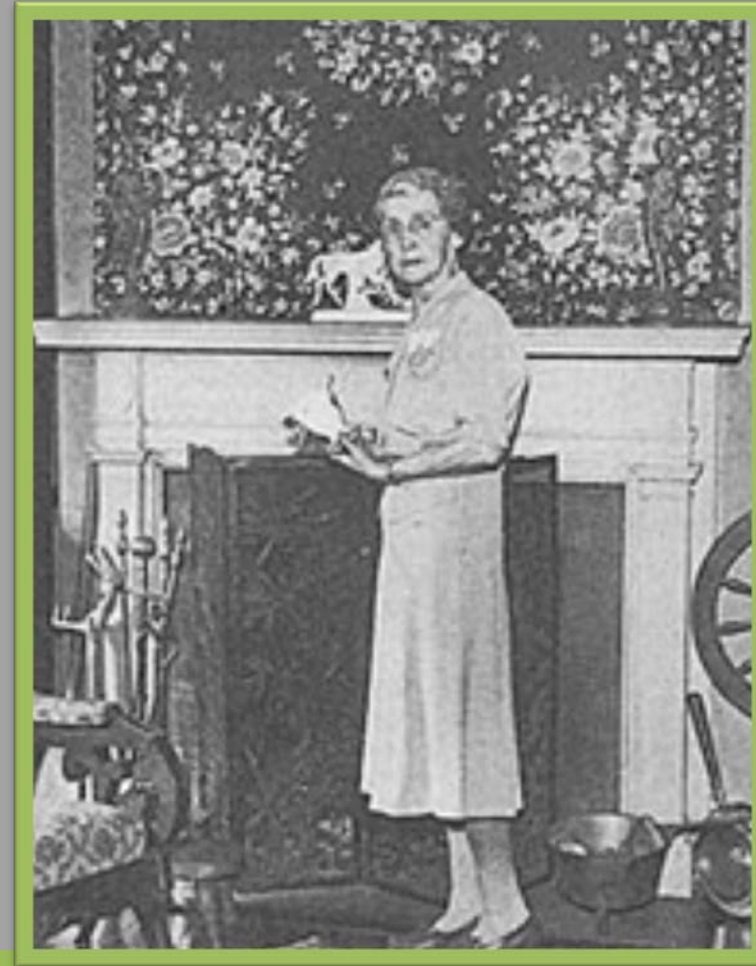



# Green Mount Cemetery

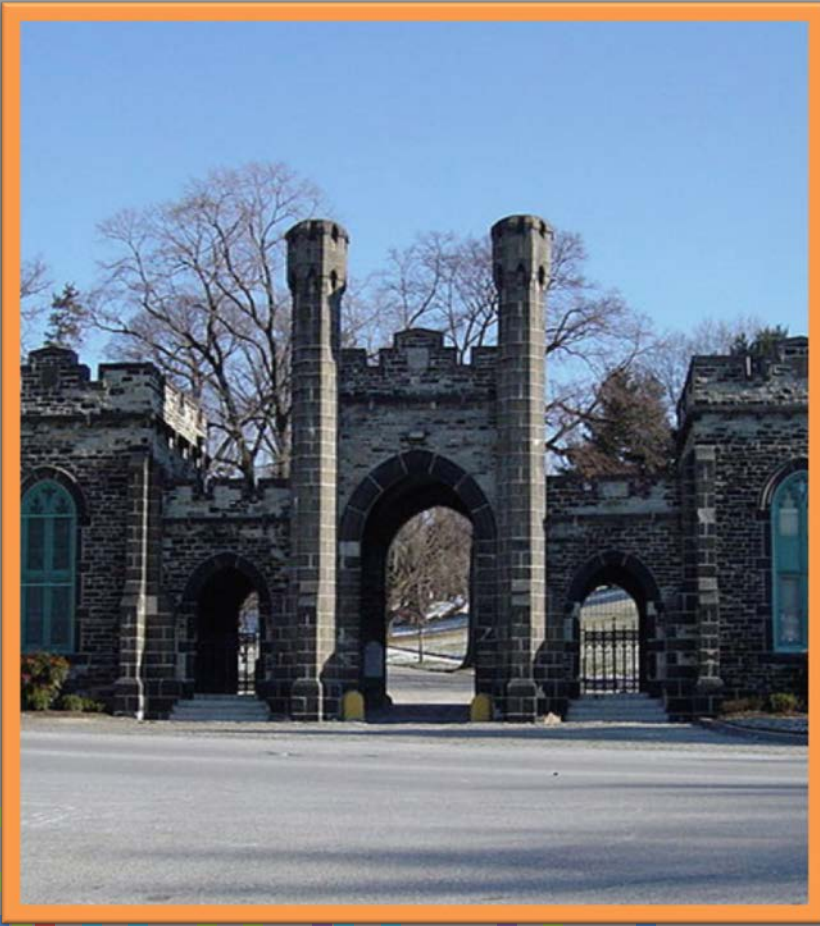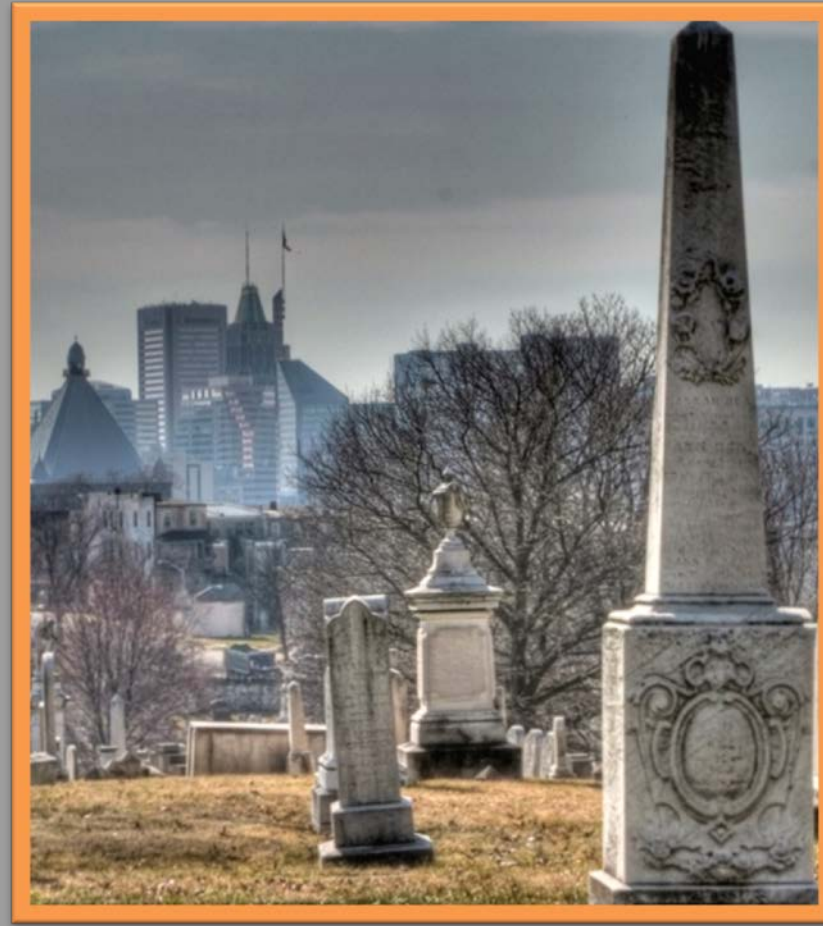

# Making it right with Miss Noyes

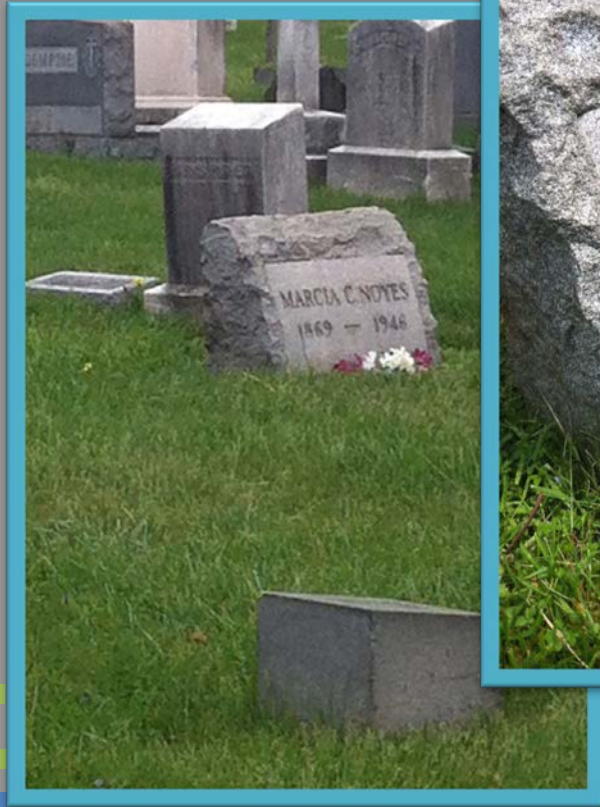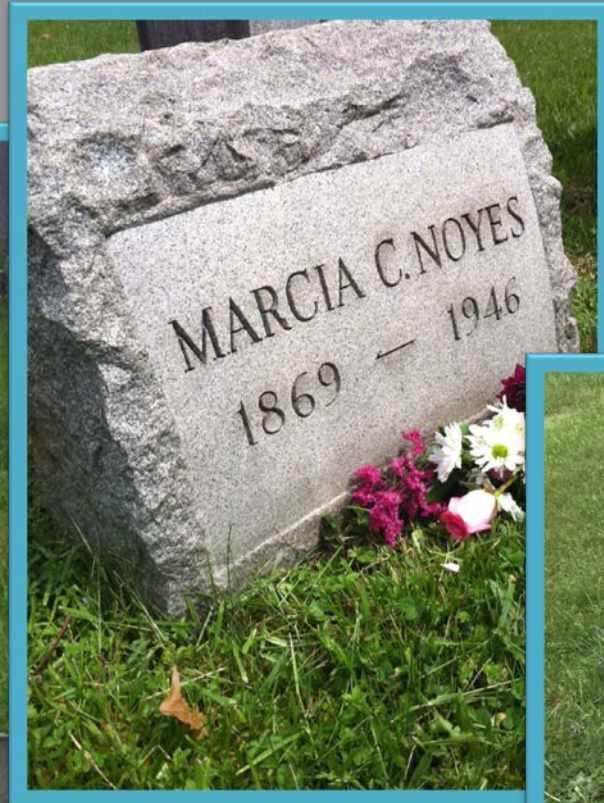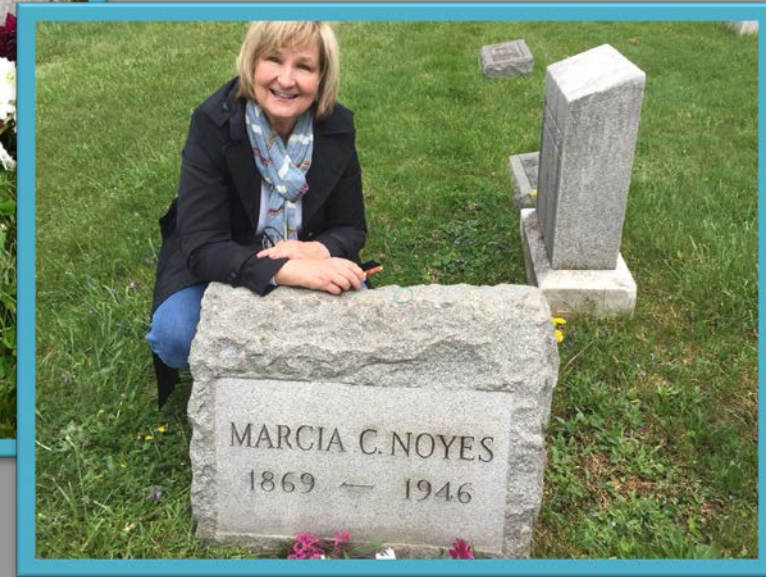

# Leadership Characteristics – ALA New Members Roundtable

- Physical – energy, stamina
- Emotional – self aware, risk taker, concerned for others, persistent
- Social - motivator, collaborator/partner, listener
- Intellectual/ Intelligence – adaptable, embraces ambiguity, lifelong learner
- Communication – articulate, one to one, one to many
- Experience – competent, participatory
- Trustworthy – caring, constant

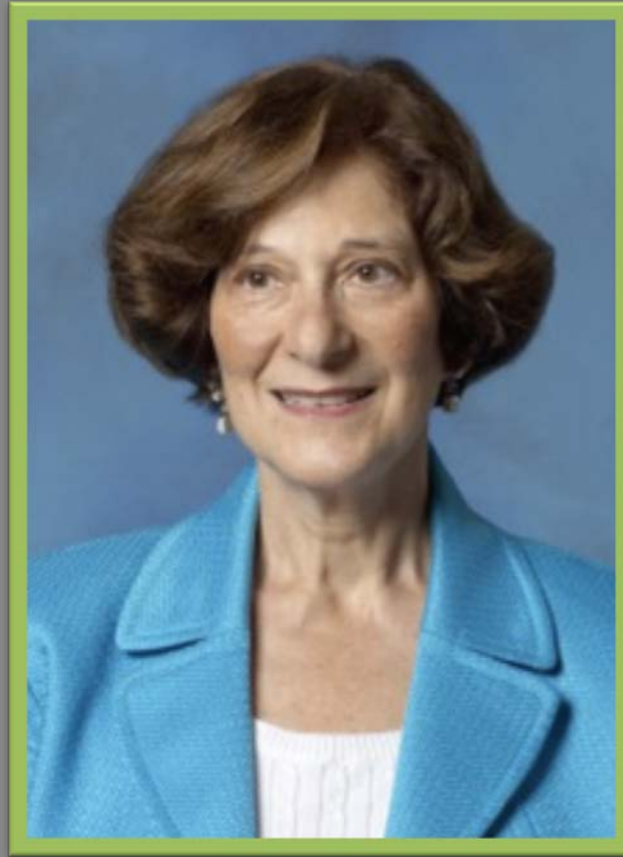

Barbara Epstein – 2015 Janet Doe Lecturer

“In Their Own Words: Oral Histories of Medical Library  
Association Past Presidents”

# Text Analysis of MLA Presidential Profiles

58 profiles

64,373 words | 7,640 unique words

176 unique common words  
accounted for 37,000 usages, removed

7,464 individual words remained

3,888 of those were only used once

# Grouping

- Playing nice with others – cooperation, collegiality, collaboration – 10 terms combined for 45 occurrences
- Management – practical, effective, efficient – 22 terms combined for 56 occurrences
- Innovation – vision, agility, imagination – 20 terms combined for 75 occurrences
- Personal qualities – humor, stamina, passion – 51 terms combined for 212 occurrences
- And others: mentoring (44), ethics (20), politics (18)

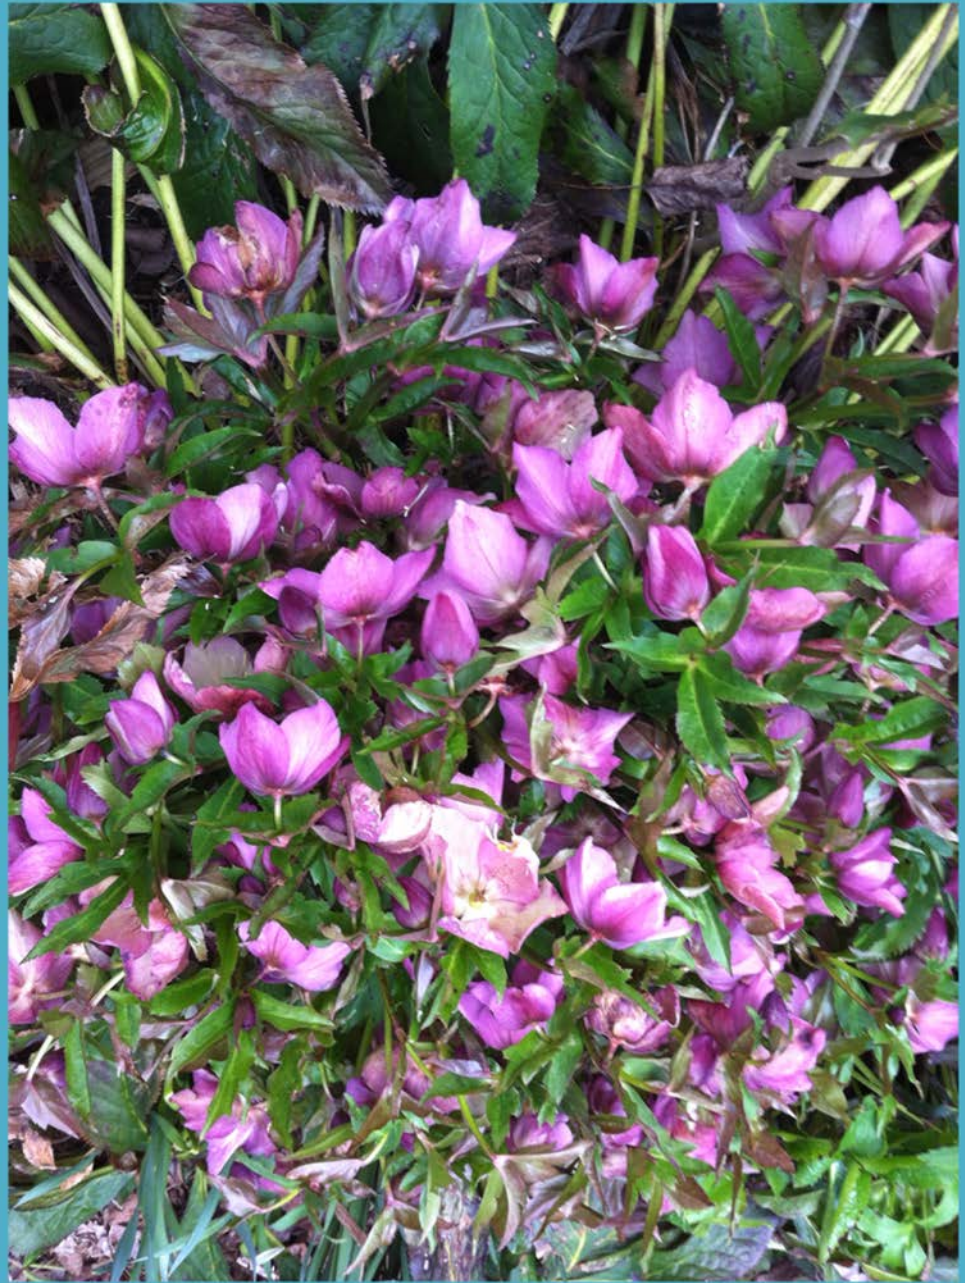

# Questions – Past 25 Years of MLA Presidents (78% response)

1. What was your path to the MLA presidency?
2. What leadership qualities did you bring to the presidency?
3. While president, what was your greatest leadership challenge?
4. What was the greatest lesson learned?
5. Have the leadership qualities needed for the MLA presidency changed?
6. What is the single most important trait for a leader to have?
7. Anything else you would like to share?



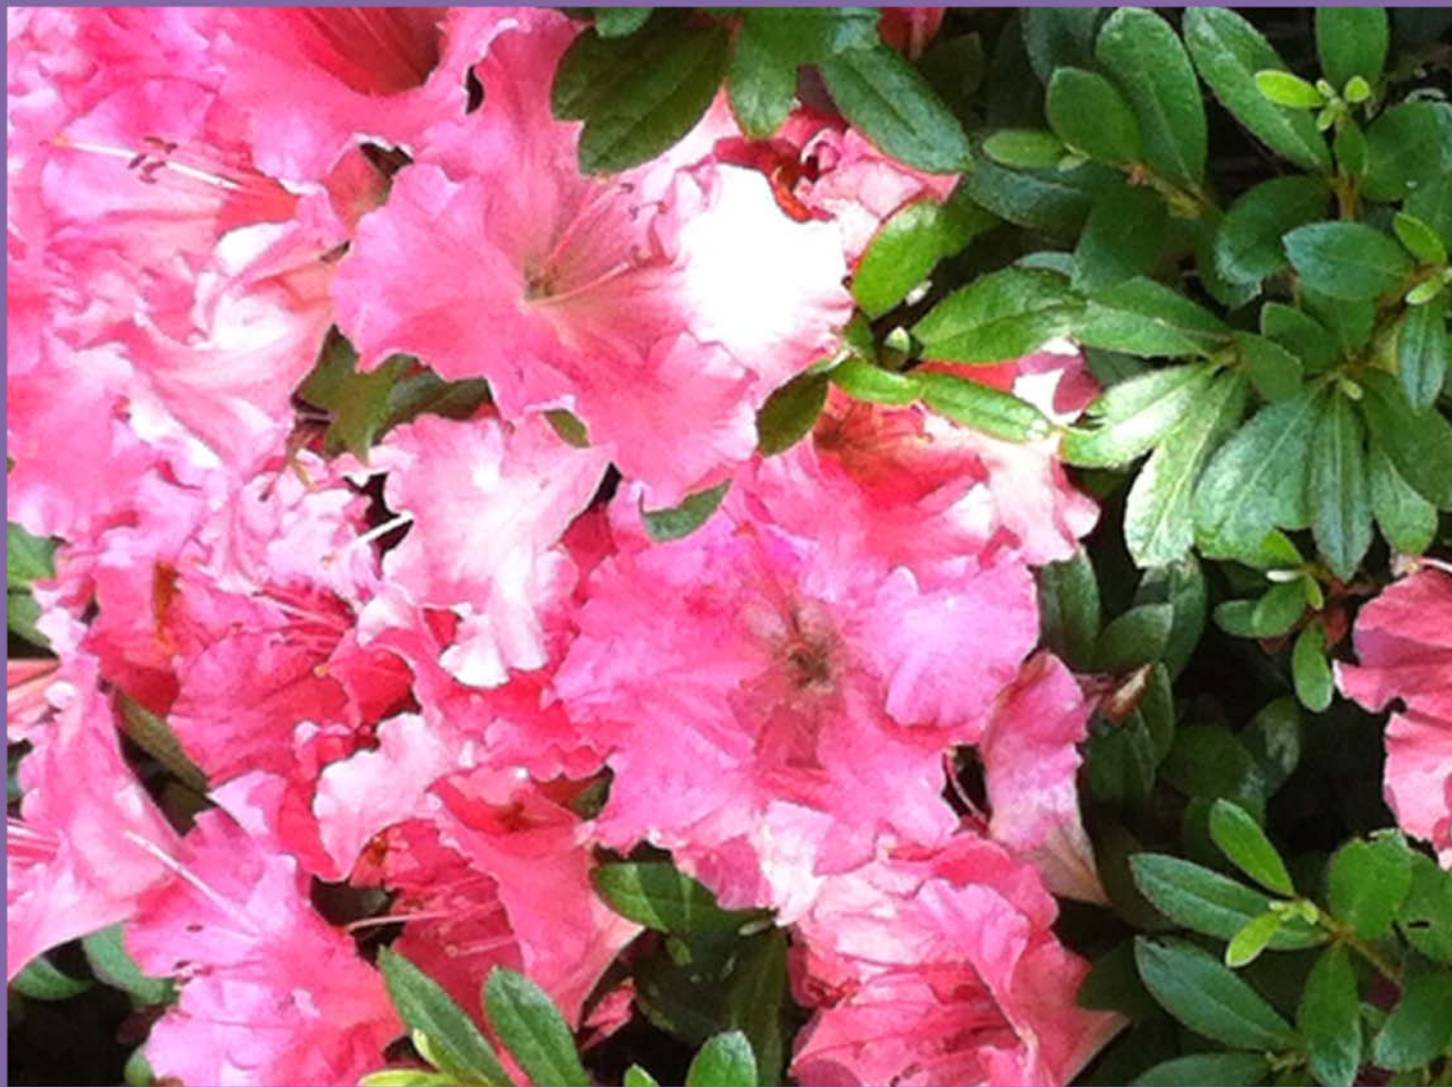

# The Presidents

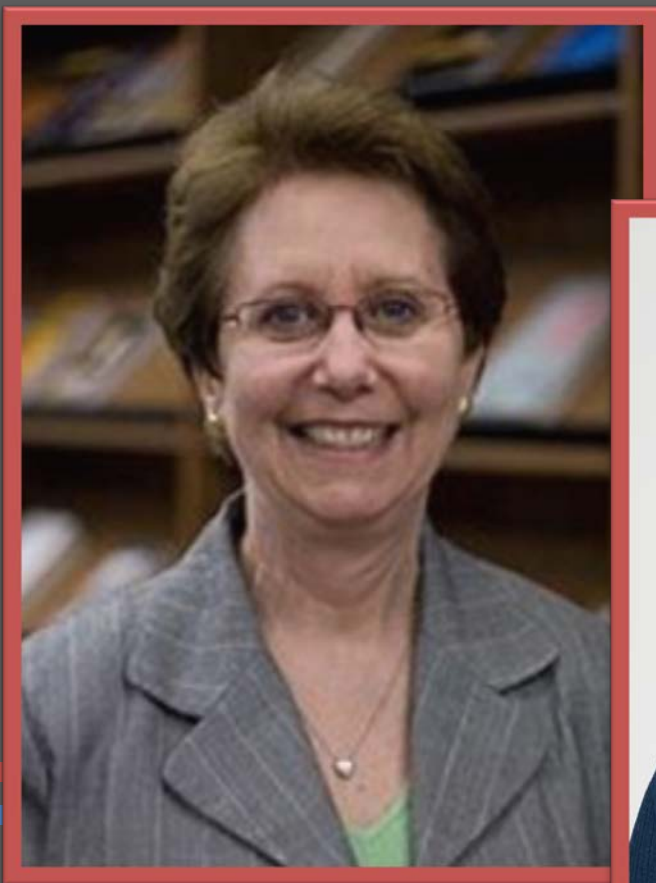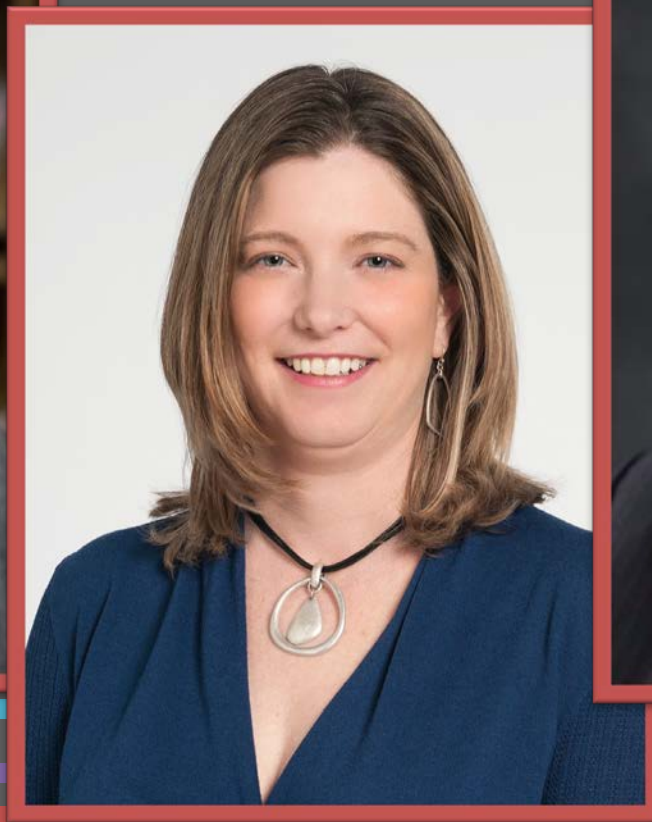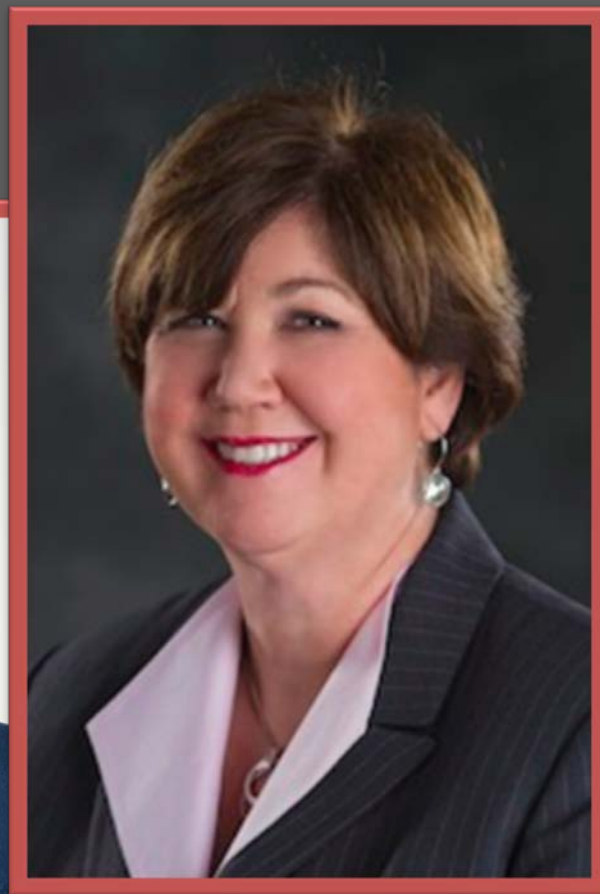

# The Board

1997

- Visionary
- Communicator
- Knowledge of MLA/environment/issues
- Motivate, persuade, inspire
- Collaborator
- Energy, stamina, enthusiasm
- Respectful
- Open
- Politically aware
- Humble
- Comfort in the spotlight
- Passion for the profession

2016

- Communicator
- Visionary
- Interpersonal skills
- Self-confident
- Enthusiasm, energy, stamina
- Calm
- Trustworthy
- Respectful
- Humble
- Good sense of humor
- Problem solving skills
- Past leadership experience
- Passion for the profession

# The Executive Directors

- Cheerleaders
- Facilitators
- Not ego-driven
- Humble
- Encouraging of different viewpoints
- Engagement of the members – inclusive
- Big picture view but saw the work to be done.

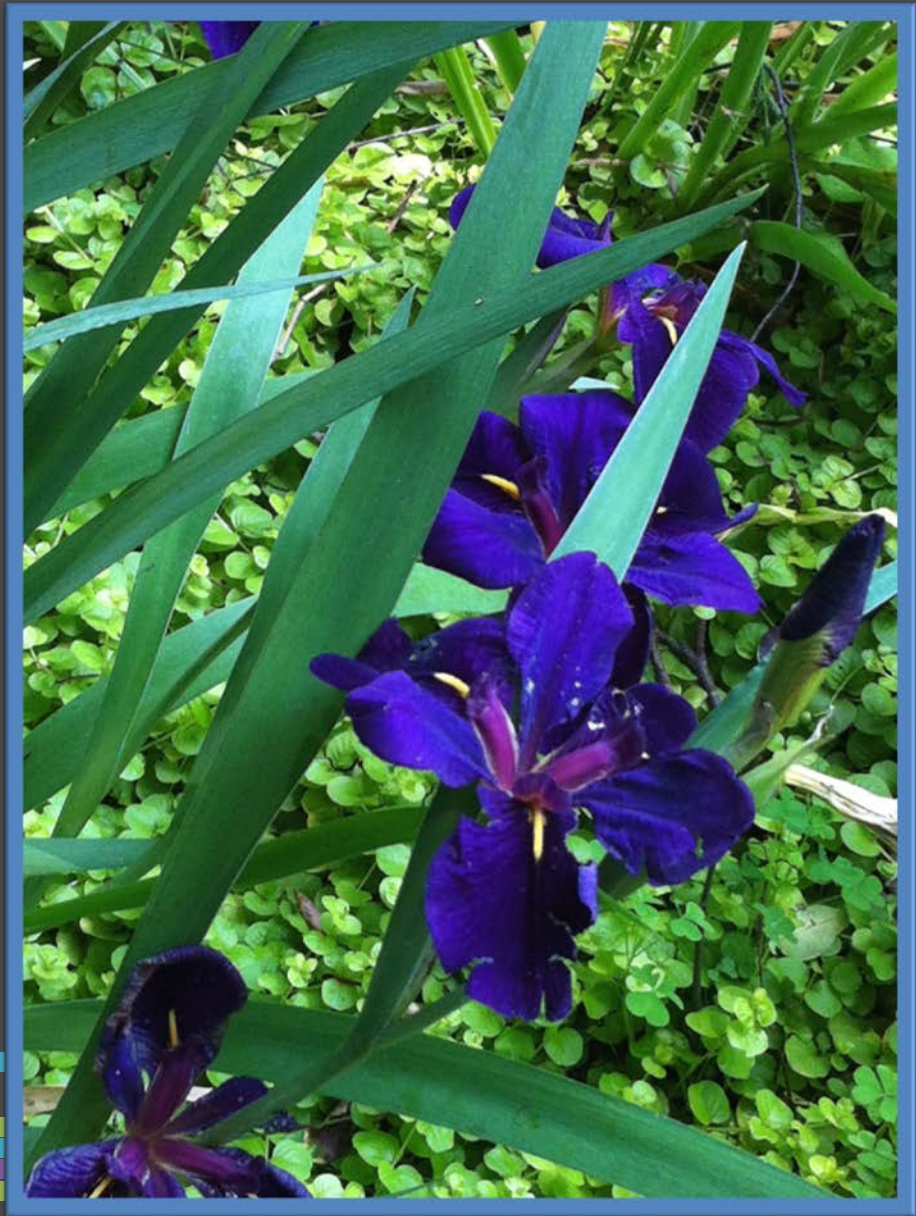



# Future Leadership Traits

- Risk taking
- Innovative mind set
- Embrace, accept, and cause disruption
- Failure tolerant
- Resilience
- Empathy not sympathy
- Strong support networks



Lighting the spark..inhabiting  
the leadership role..MLA

Education

Awards and recognition

Experiential leader development

Mentoring

A decorative graphic on the left side of the slide, consisting of a grid of small, multi-colored squares (blue, green, red, purple, cyan) that tapers from left to right, creating a triangular shape.

# Kouzes and Posner – *Five Practices of Exemplary Leadership*

- Model the way
- Inspire a shared vision
- Challenge the process
- Enable others to act
- Encourage the heart





Leadership with a small “I”

Drew Dudley  
2010 TEDx Toronto  
“Everyday Leadership”

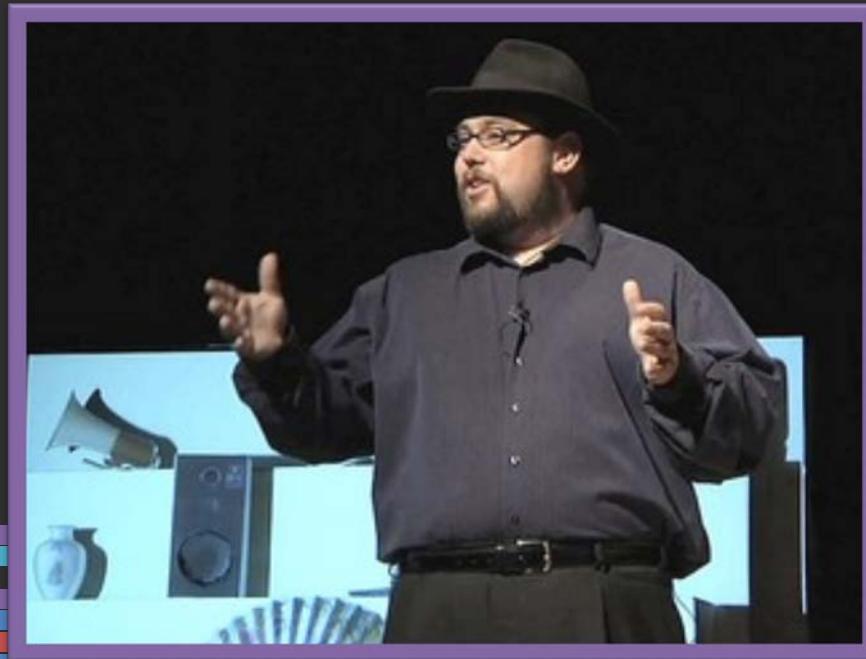

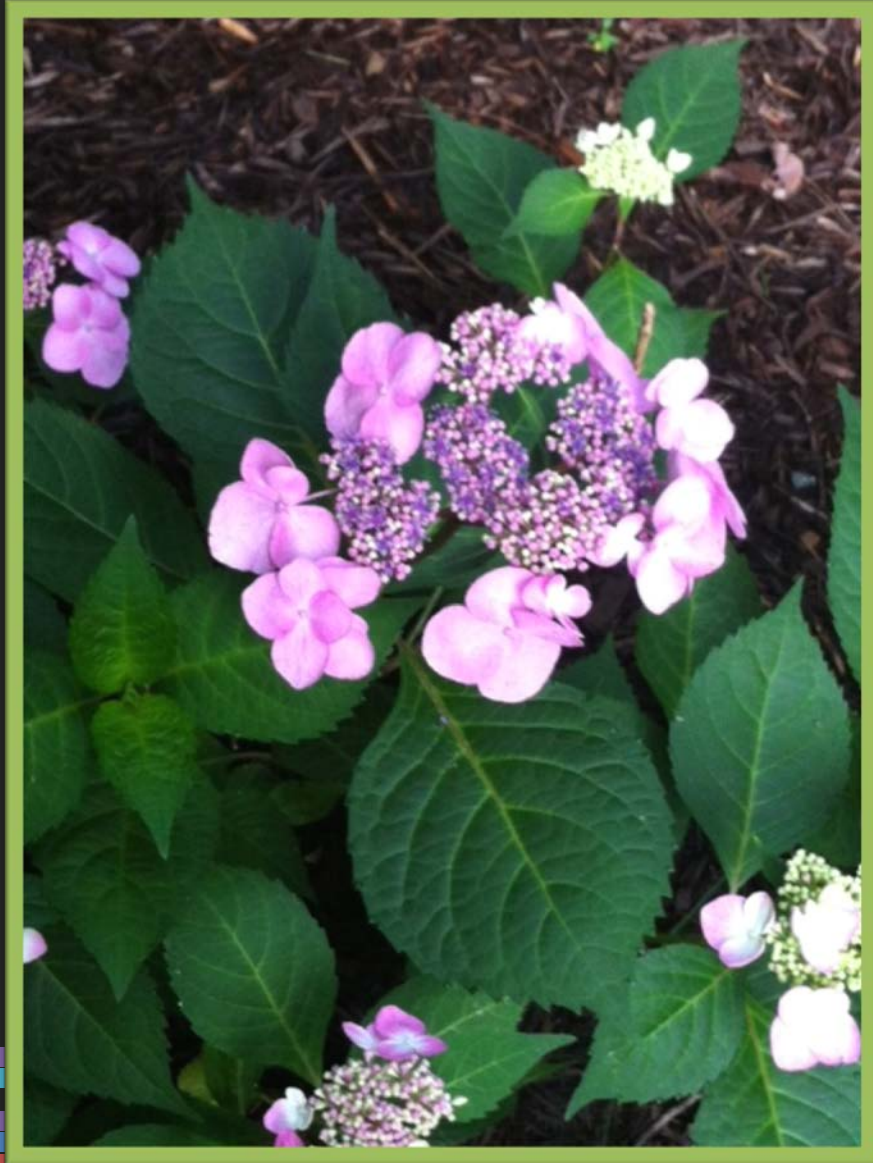



Thank you

We Can Be Heroes:  
MLA's Leadership Journey(s)
